# Supplementary material for: A supramolecular recyclable catalyst for aqueous Suzuki–Miyaura coupling
Source: Royal Society of Chemistry journal article supplement (doi:10.1039/c4ra13953d), 2014-12-02
Supplement: c4ra13953d1.pdf [file c4ra13953d1.pdf]

## **Supporting Information**

### **A Supramolecular Recyclable Catalyst for Aqueous Suzuki-Miyaura Coupling**

Miao Qi, <sup>a,b</sup> Pei Zi Tan, <sup>a,b</sup> Fei Xue, <sup>a,b</sup> Haripal Singh Malhi, <sup>a, c</sup> Zhong-Xing Zhang, <sup>\*a</sup> David J. Young, <sup>\*a,c,d</sup> T. S. Andy Hor <sup>\*a,b</sup>

*<sup>a</sup>Institute of Materials Research and Engineering, A\*STAR (Agency for Science, Technology and Research), 3 Research Link, Singapore 117602, Republic of Singapore*

*<sup>b</sup>Department of Chemistry, Faculty of Science, National University of Singapore, 3 Science Drive 3, Singapore, 117543*

*<sup>c</sup>Faculty of Science, Universiti Brunei Darussalam, Jalan Tungku Link, Gadong BE1410, Brunei Darussalam*

*<sup>d</sup>School of Science, Monash University Malaysia, 47500 Bandar Sunway, Selangor D.E., Malaysia*

---

\* Corresponding author. E-mails: [andyhor@imre.a-star.edu.sg](mailto:andyhor@imre.a-star.edu.sg); [andyhor@nus.edu.sg](mailto:andyhor@nus.edu.sg); [david.james.young@monash.edu](mailto:david.james.young@monash.edu); [zhangzx@imre.a-star.edu.sg](mailto:zhangzx@imre.a-star.edu.sg); Telephone: +65-68744341 (Prof. T. S. A. Hor); (+603) 5514 5674 (Prof. D. J. Young).

## 1. Materials

(3,5-Dimethyl-1H-pyrazolyl)methanol, 1-adamantanemethylamine, anhydrous acetonitrile and PdCl<sub>2</sub> were purchased from Sigma-Aldrich. Heptakis(2,6-di-O-methyl)- $\beta$ -cyclodextrin-dimethyl (dm $\beta$ -CD) was purchased from Sigma. All substrates for Suzuki-Miyaura coupling reaction were purchased from Sigma-Aldrich. All other reagents and solvents were used as received without further purification.

## 2. Measurements and Experimental Methods

**2.1 General.** Proton and carbon nuclear magnetic resonance (<sup>1</sup>H and <sup>13</sup>C NMR) spectra were recorded at room temperature on a Bruker Avance DRX 300 MHz NMR spectrometer operating at 300.1 and 75.5 MHz, respectively; or on a Bruker Avance DRX 500 MHz NMR spectrometer operating at 500.1 and 125.8 MHz, respectively. Chemical shifts were reported in parts per million (ppm) on the  $\delta$  scale, and were referenced to residual protonated solvent peaks: CDCl<sub>3</sub> spectra were referenced to CHCl<sub>3</sub> at  $\delta_H$  7.26 and CDCl<sub>3</sub> at  $\delta_C$  77.36; D<sub>2</sub>O spectra were referenced to HDO at  $\delta_H$  4.70; Acetone-*d*<sub>6</sub> spectra were referenced to (CHD<sub>2</sub>)(CD<sub>3</sub>)CO at  $\delta_H$  2.09. The two-dimensional nuclear overhauser effect spectroscopy (2D-NOESY) NMR experiments were performed at 500 MHz in D<sub>2</sub>O/DMSO-*d*<sub>6</sub> on a Bruker Avance DRX 500 MHz NMR spectrometer with sodium 3-(trimethylsilyl)propane-1-sulfonate as reference. ESI-MS was performed on a Finnigan LCQ quadrupole ion trap mass spectrometer. Elemental analysis was carried out using a Perkin-Elmer 2400 CHN/CHNS elemental analyzer.

### 2.2 X-ray Crystal Structure for adamantyl-containing Pd(II) complex (Ad-L-PdCl<sub>2</sub>)

Crystals suitable for X-ray diffraction were obtained by recrystallization from CH<sub>2</sub>Cl<sub>2</sub>/diethyl ether. Single crystal X-ray diffraction data was collected on a Bruker-AXS Smart Apex CCD diffractometer. Structure solution and refinement were carried out with the Bruker SHELXTL suite of programmes. Single crystal data and structure refinement parameters for this compound can be found in Table S1.

**Table S1.** Single crystal data and structure refinement parameters for adamantly-containing Pd(II) complex (Ad-L-PdCl<sub>2</sub>)

|                                   |                                                                   |                   |
|-----------------------------------|-------------------------------------------------------------------|-------------------|
| Identification code               | Ad-L-PdCl <sub>2</sub>                                            |                   |
| Empirical formula                 | C <sub>23</sub> H <sub>35</sub> Cl <sub>2</sub> N <sub>5</sub> Pd |                   |
| Formula weight                    | 558.86                                                            |                   |
| Temperature                       | 100(2) K                                                          |                   |
| Wavelength                        | 0.71073 Å                                                         |                   |
| Crystal system                    | Monoclinic                                                        |                   |
| Space group                       | P2(1)/c                                                           |                   |
| Unit cell dimensions              | a = 9.8954(5) Å                                                   | α = 90°.          |
|                                   | b = 13.9545(6) Å                                                  | β = 96.7110(10)°. |
|                                   | c = 17.7018(8) Å                                                  | γ = 90°.          |
| Volume                            | 2427.61(19) Å <sup>3</sup>                                        |                   |
| Z                                 | 4                                                                 |                   |
| Density (calculated)              | 1.529 Mg/m <sup>3</sup>                                           |                   |
| Absorption coefficient            | 1.005 mm <sup>-1</sup>                                            |                   |
| F(000)                            | 1152                                                              |                   |
| Crystal size                      | 0.38 x 0.17 x 0.15 mm <sup>3</sup>                                |                   |
| Theta range for data collection   | 1.86 to 27.50°.                                                   |                   |
| Index ranges                      | -12 ≤ h ≤ 12, -18 ≤ k ≤ 15, -21 ≤ l ≤ 22                          |                   |
| Reflections collected             | 16817                                                             |                   |
| Independent reflections           | 5558 [R(int) = 0.0331]                                            |                   |
| Completeness to theta = 27.50°    | 99.8 %                                                            |                   |
| Absorption correction             | Semi-empirical from equivalents                                   |                   |
| Max. and min. transmission        | 0.8638 and 0.7013                                                 |                   |
| Refinement method                 | Full-matrix least-squares on F <sup>2</sup>                       |                   |
| Data / restraints / parameters    | 5558 / 0 / 284                                                    |                   |
| Goodness-of-fit on F <sup>2</sup> | 1.084                                                             |                   |
| Final R indices [I > 2σ(I)]       | R1 = 0.0331, wR2 = 0.0773                                         |                   |
| R indices (all data)              | R1 = 0.0369, wR2 = 0.0791                                         |                   |
| Largest diff. peak and hole       | 0.656 and -0.449 e.Å <sup>-3</sup>                                |                   |

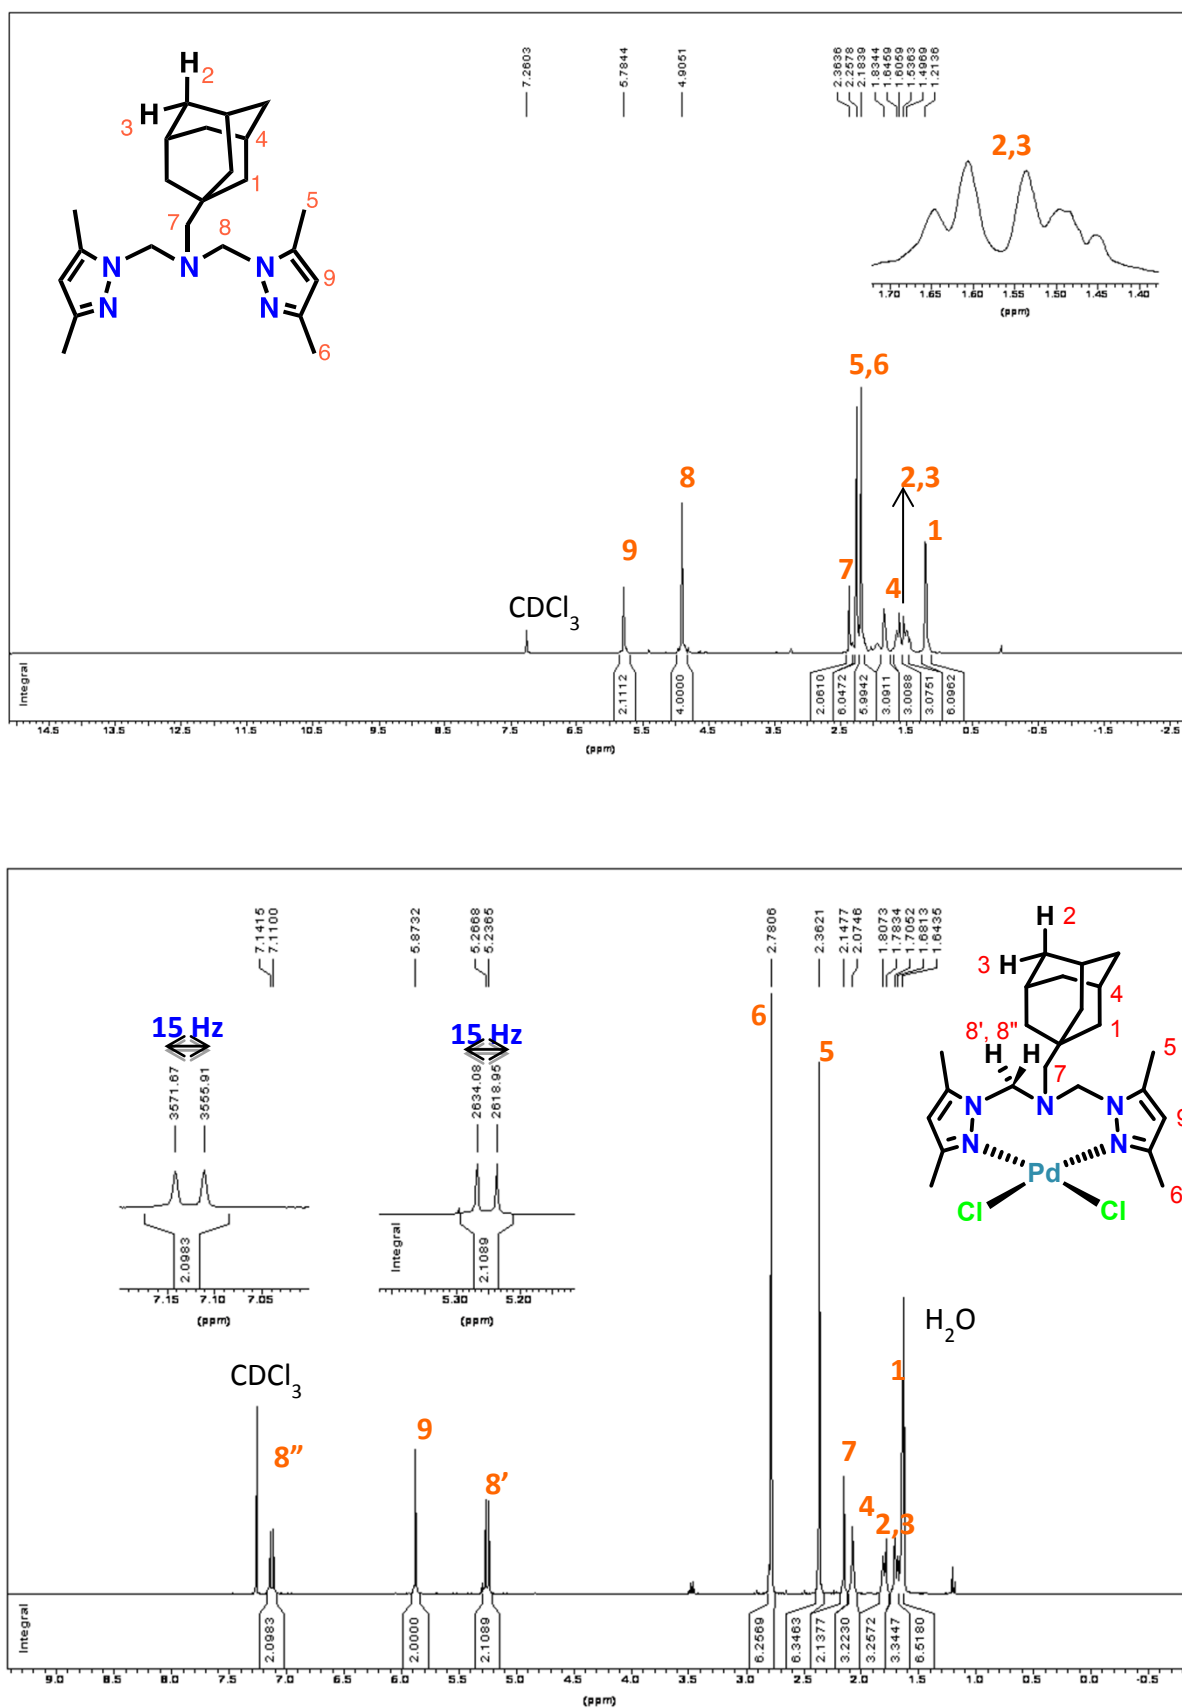

**Figure S1.** (top) <sup>1</sup>H NMR spectrum of the ligand Ad-L in CDCl<sub>3</sub> (300 MHz, 25 °C); (bottom) <sup>1</sup>H NMR spectrum of the Pd(II) complex Ad-L-PdCl<sub>2</sub> in CDCl<sub>3</sub> (500 MHz, 25 °C).

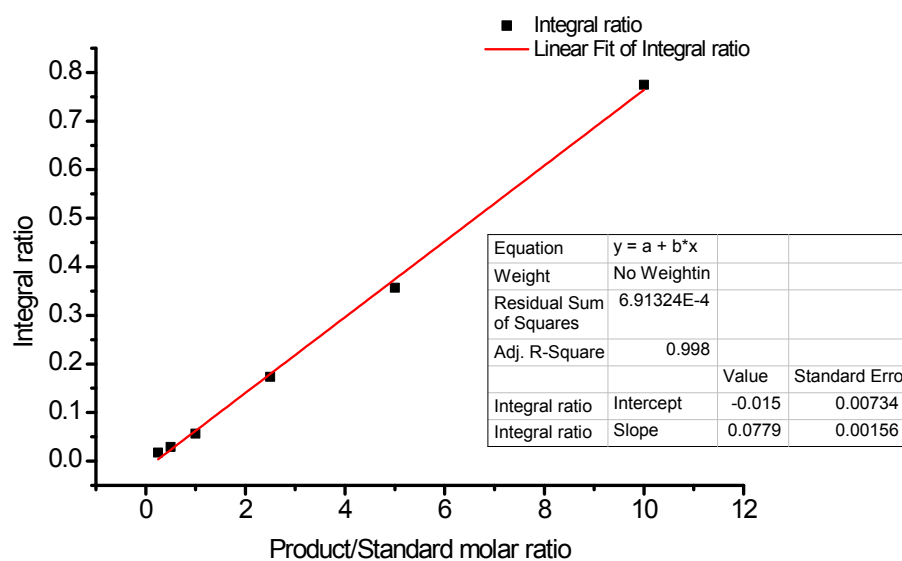

**Figure S2.** Calibration curve based on  $^1\text{H}$  NMR analysis (in  $d_6$ -acetone) for the yield calculation for Suzuki-Miyaura coupling reaction (product is biphenyl-4-carboxylic acid; standard is hexadecane).
